# Supplementary material
Source: PubMed Central journal article supplement (PMC5412689)
Supplement: GEPI-41-341-s001.pdf [file GEPI-41-341-s001.pdf]

Semiparametric methods for estimation of a non-linear  
exposure–outcome relationship using instrumental variables with  
application to Mendelian randomization: Supplementary Data

James R Staley<sup>1</sup> & Stephen Burgess<sup>1</sup>

<sup>1</sup>Cardiovascular Epidemiology Unit, Department of Public Health and Primary Care,  
University of Cambridge, United Kingdom.

Correspondence:

Dr Stephen Burgess

Department of Public Health & Primary Care

Strangeways Research Laboratory

Wort's Causeway

Cambridge

CB1 8RN

UK

Email: sb452@medschl.cam.ac.uk

Telephone: +44 (0) 1223 748651

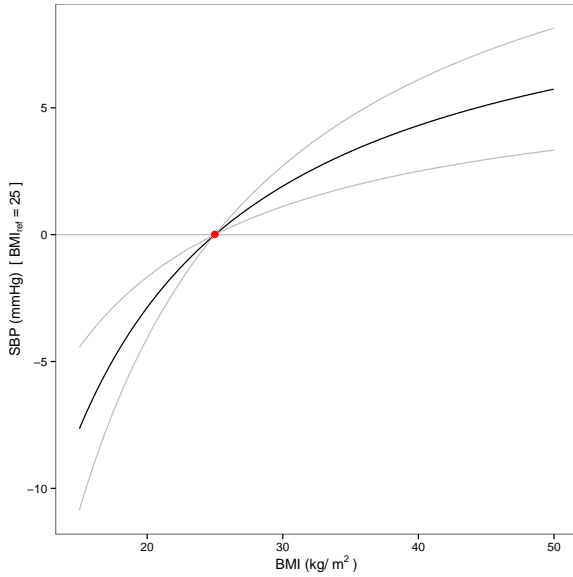

(a) SBP (Fractional polynomial model)

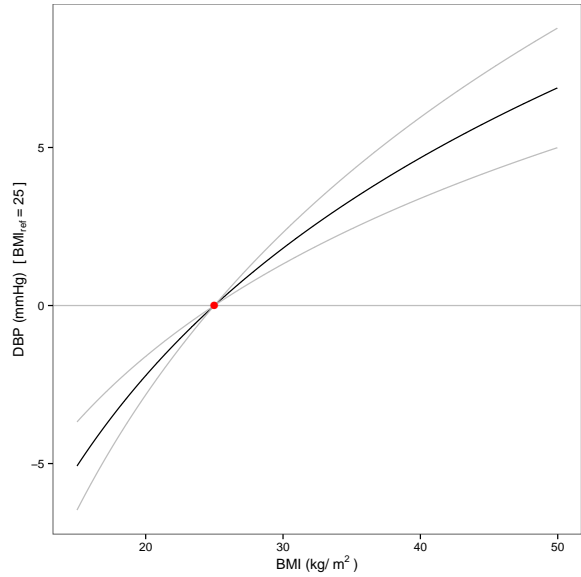

(b) DBP (Fractional polynomial model)

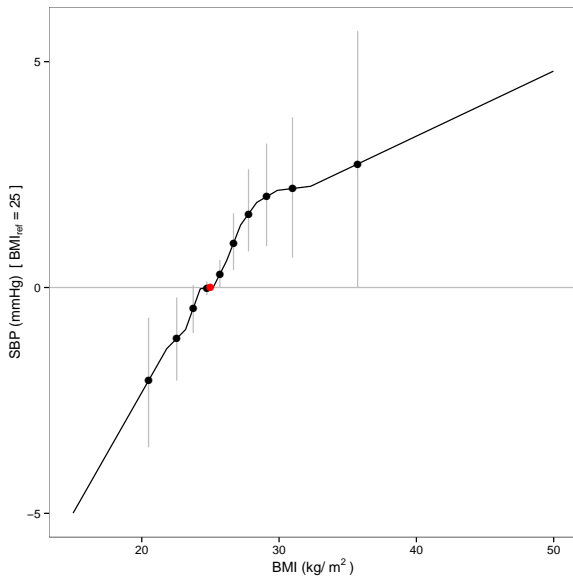

(c) SBP (Piecewise linear model)

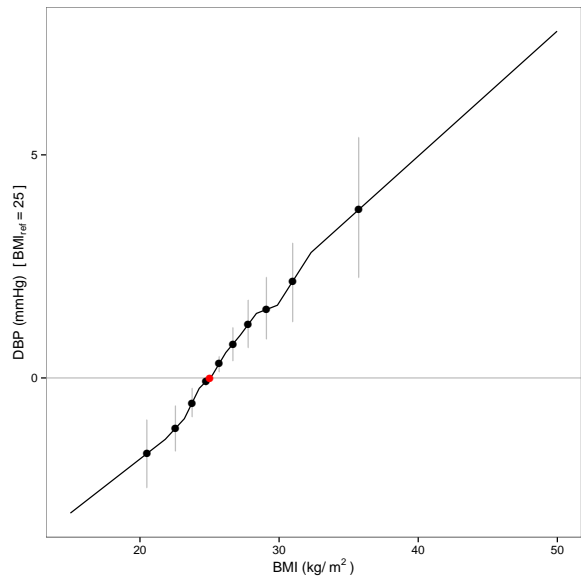

(d) DBP (Piecewise linear model)

Figure S1 Causal effects of body mass index (BMI) on blood pressure (systolic blood pressure, SBP; diastolic blood pressure, DBP) in individuals with no history of hypertension using the fractional polynomial and piecewise linear methods on data from UK Biobank. The red point represents the reference point of BMI of 25 kg/m<sup>2</sup>. Grey lines represent 95% CIs. The fractional polynomial method used 100 strata, whereas the piecewise linear method used 10 strata.

Table S1: Simulation results for fractional polynomials of degree 1.

| $p$  | $\beta$ | Fitting correct FP  |         | Fitting all FPs |         |       |              |              |
|------|---------|---------------------|---------|-----------------|---------|-------|--------------|--------------|
|      |         | Mean (SD) [Mean SE] |         | Coverage        | Powers  |       | Heuristic    |              |
|      |         | $\hat{\beta}$       |         | $\hat{\beta}$   | Correct | Set   | Correct FP   | Best FP      |
| -2   | 0       | 0.030 (0.953)       | [0.933] | 0.946           | -       | -     | -            | -            |
| -2   | 1       | 1.006 (0.924)       | [0.929] | 0.960           | 0.434   | 0.952 | 1.14 (0.87)  | 1.21 (0.85)  |
| -2   | 2       | 2.012 (0.956)       | [0.933] | 0.928           | 0.496   | 0.942 | 1.17 (0.92)  | 1.29 (0.92)  |
| -1   | 0       | 0.046 (0.700)       | [0.646] | 0.932           | -       | -     | -            | -            |
| -1   | 1       | 0.936 (0.635)       | [0.643] | 0.956           | 0.070   | 0.950 | 1.03 (0.80)  | 1.13 (0.84)  |
| -1   | 2       | 1.921 (0.654)       | [0.641] | 0.946           | 0.142   | 0.956 | 1.06 (0.81)  | 1.21 (0.82)  |
| -0.5 | 0       | -0.013 (0.774)      | [0.742] | 0.922           | -       | -     | -            | -            |
| -0.5 | 1       | 0.981 (0.724)       | [0.743] | 0.946           | 0.050   | 0.946 | 0.95 (0.75)  | 1.07 (0.79)  |
| -0.5 | 2       | 1.959 (0.752)       | [0.740] | 0.938           | 0.088   | 0.912 | 0.99 (0.78)  | 1.17 (0.83)  |
| 0    | 0       | -0.009 (0.221)      | [0.211] | 0.934           | -       | -     | -            | -            |
| 0    | 1       | 0.979 (0.215)       | [0.210] | 0.944           | 0.172   | 0.918 | 0.95 (0.74)  | 1.20 (0.79)  |
| 0    | 2       | 1.976 (0.210)       | [0.212] | 0.954           | 0.386   | 0.910 | 0.94 (0.72)  | 1.22 (0.76)  |
| 0.5  | 0       | 0.000 (0.246)       | [0.233] | 0.930           | -       | -     | -            | -            |
| 0.5  | 1       | 1.003 (0.246)       | [0.234] | 0.936           | 0.194   | 0.892 | 0.93 (0.70)  | 1.19 (0.75)  |
| 0.5  | 2       | 1.987 (0.239)       | [0.235] | 0.932           | 0.340   | 0.904 | 0.91 (0.68)  | 1.21 (0.79)  |
| 1    | 0       | 0.003 (0.064)       | [0.064] | 0.938           | -       | -     | -            | -            |
| 1    | 1       | 0.997 (0.066)       | [0.065] | 0.944           | 0.748   | 0.938 | 0.88 (0.64)  | 1.12 (0.79)  |
| 1    | 2       | 1.997 (0.071)       | [0.068] | 0.938           | 0.912   | 0.958 | 0.92 (0.70)  | 1.08 (0.91)  |
| 2    | 0       | 0.000 (0.009)       | [0.008] | 0.942           | -       | -     | -            | -            |
| 2    | 1       | 1.015 (0.012)       | [0.012] | 0.756           | 1.000   | 1.000 | 1.66 (1.07)  | 1.66 (1.07)  |
| 2    | 2       | 2.031 (0.015)       | [0.015] | 0.436           | 1.000   | 1.000 | 3.16 (1.49)  | 3.16 (1.49)  |
| 3    | 0       | 0.000 (0.001)       | [0.001] | 0.942           | -       | -     | -            | -            |
| 3    | 1       | 1.034 (0.006)       | [0.005] | 0.000           | 1.000   | 1.000 | 17.75 (3.10) | 17.75 (3.10) |
| 3    | 2       | 2.068 (0.011)       | [0.009] | 0.000           | 1.000   | 1.000 | 35.74 (5.64) | 35.74 (5.64) |

$p$  is the power, and  $\beta$  is the effect parameter. Coverage refers to the number of replications where the true  $\beta$  was contained within the corresponding 95%CI. The power was correctly chosen (Correct) if the best-fitting fractional polynomial was also the correct fractional polynomial, whilst the correct model was within the set of powers that fit the data equally as well as the best-fitting fractional polynomial (Set) if the difference between twice the log-likelihood for the correct model and the best-fitting model was less than the 90th percentile of the relevant  $\chi^2$  distribution. The heuristic statistic (mean (SD) across simulations) is the sum of the absolute values of the predicted value of the outcome minus the correct value of the outcome at the mean value of the exposure in deciles of the IV-free distribution. The heuristic statistic is calculated both for the correct fractional polynomial (Correct FP), and for the best-fitted fractional polynomial (Best FP). SD, standard deviation; SE, standard error; FP, fractional polynomial; IV, instrumental variable; CI, confidence interval.

Table S2: Simulation results for fractional polynomials of degree 2 with  $\beta_1 = 1$  and  $\beta_2 = 2$ .

|       |       | Fitting correct FP  |         |                 |         |                 |                 | Fitting all FPs |       |               |               |  |  |
|-------|-------|---------------------|---------|-----------------|---------|-----------------|-----------------|-----------------|-------|---------------|---------------|--|--|
|       |       | Mean (SD) [Mean SE] |         |                 |         | Coverage        |                 | Powers          |       | Heuristic     |               |  |  |
| $p_1$ | $p_2$ | $\hat{\beta}_1$     |         | $\hat{\beta}_2$ |         | $\hat{\beta}_1$ | $\hat{\beta}_2$ | Correct         | Set   | Correct FP    | Best FP       |  |  |
| -2    | -2    | 0.856 (3.756)       | [3.606] | 2.178 (6.653)   | [6.502] | 0.926           | 0.942           | 0.272           | 0.988 | 1.55 (1.08)   | 1.48 (1.02)   |  |  |
| -2    | -1    | 0.433 (5.995)       | [5.994] | 2.281 (4.170)   | [4.160] | 0.950           | 0.950           | 0.012           | 0.974 | 1.41 (0.91)   | 1.43 (0.89)   |  |  |
| -2    | -0.5  | 1.305 (4.041)       | [3.833] | 1.784 (3.173)   | [3.070] | 0.934           | 0.944           | 0.010           | 0.986 | 1.45 (0.93)   | 1.44 (0.94)   |  |  |
| -2    | 0     | 0.812 (2.786)       | [2.805] | 1.955 (0.624)   | [0.636] | 0.946           | 0.950           | 0.026           | 0.958 | 1.34 (0.83)   | 1.48 (0.91)   |  |  |
| -2    | 0.5   | 0.954 (2.142)       | [2.187] | 1.999 (0.552)   | [0.552] | 0.958           | 0.954           | 0.036           | 0.964 | 1.28 (0.79)   | 1.44 (0.93)   |  |  |
| -2    | 1     | 1.102 (1.887)       | [1.974] | 2.003 (0.135)   | [0.140] | 0.948           | 0.948           | 0.072           | 0.964 | 1.40 (0.88)   | 1.67 (1.07)   |  |  |
| -2    | 2     | 0.310 (2.830)       | [2.514] | 2.025 (0.034)   | [0.030] | 0.908           | 0.828           | 0.314           | 0.964 | 3.91 (1.73)   | 5.01 (2.70)   |  |  |
| -2    | 3     | -6.114 (8.221)      | [6.580] | 2.051 (0.023)   | [0.018] | 0.812           | 0.280           | 0.440           | 0.980 | 37.67 (5.59)  | 34.6 (6.79)   |  |  |
| -1    | -1    | 1.004 (0.713)       | [0.718] | 2.067 (3.855)   | [3.776] | 0.946           | 0.946           | 0.008           | 0.980 | 1.31 (0.87)   | 1.37 (0.95)   |  |  |
| -1    | -0.5  | 0.525 (7.081)       | [7.247] | 2.551 (8.175)   | [8.363] | 0.952           | 0.948           | 0.002           | 0.962 | 1.31 (0.87)   | 1.38 (0.91)   |  |  |
| -1    | 0     | 1.399 (3.551)       | [3.505] | 2.109 (1.184)   | [1.146] | 0.944           | 0.938           | 0.006           | 0.968 | 1.30 (0.78)   | 1.47 (0.91)   |  |  |
| -1    | 0.5   | 0.815 (2.166)       | [2.265] | 1.929 (0.784)   | [0.824] | 0.954           | 0.958           | 0.006           | 0.964 | 1.29 (0.83)   | 1.49 (0.99)   |  |  |
| -1    | 1     | 0.871 (1.915)       | [1.887] | 1.985 (0.193)   | [0.192] | 0.942           | 0.938           | 0.004           | 0.962 | 1.33 (0.79)   | 1.70 (1.05)   |  |  |
| -1    | 2     | 0.293 (2.488)       | [2.204] | 2.020 (0.043)   | [0.037] | 0.900           | 0.902           | 0.026           | 0.956 | 3.74 (1.54)   | 4.73 (2.61)   |  |  |
| -1    | 3     | -3.729 (6.988)      | [5.521] | 2.051 (0.029)   | [0.022] | 0.820           | 0.432           | 0.026           | 0.966 | 36.58 (5.29)  | 34.62 (6.74)  |  |  |
| -0.5  | -0.5  | 1.021 (3.551)       | [3.588] | 1.959 (3.903)   | [3.974] | 0.938           | 0.946           | 0.018           | 0.990 | 1.28 (0.81)   | 1.37 (0.86)   |  |  |
| -0.5  | 0     | 1.113 (7.621)       | [7.615] | 2.008 (2.159)   | [2.158] | 0.956           | 0.952           | 0.002           | 0.982 | 1.25 (0.84)   | 1.44 (0.99)   |  |  |
| -0.5  | 0.5   | 1.296 (3.715)       | [3.688] | 2.093 (1.162)   | [1.162] | 0.944           | 0.946           | 0.002           | 0.968 | 1.20 (0.79)   | 1.5 (1.05)    |  |  |
| -0.5  | 1     | 0.752 (2.843)       | [2.787] | 1.979 (0.246)   | [0.246] | 0.944           | 0.946           | 0.002           | 0.938 | 1.30 (0.79)   | 1.76 (1.08)   |  |  |
| -0.5  | 2     | 0.314 (3.249)       | [3.012] | 2.022 (0.049)   | [0.044] | 0.922           | 0.896           | 0.012           | 0.974 | 3.66 (1.52)   | 4.51 (2.33)   |  |  |
| -0.5  | 3     | -5.579 (8.982)      | [7.322] | 2.049 (0.031)   | [0.025] | 0.836           | 0.500           | 0.022           | 0.954 | 36.60 (5.48)  | 35.21 (7.03)  |  |  |
| 0     | 0     | 0.891 (1.287)       | [1.336] | 2.036 (0.553)   | [0.576] | 0.952           | 0.956           | 0.008           | 0.966 | 1.23 (0.78)   | 1.64 (1.07)   |  |  |
| 0     | 0.5   | 0.996 (2.106)       | [2.033] | 1.977 (2.346)   | [2.262] | 0.938           | 0.934           | 0.004           | 0.964 | 1.21 (0.72)   | 1.53 (0.95)   |  |  |
| 0     | 1     | 1.004 (1.149)       | [1.172] | 1.996 (0.353)   | [0.362] | 0.940           | 0.940           | 0.012           | 0.948 | 1.22 (0.77)   | 1.69 (1.10)   |  |  |
| 0     | 2     | 1.303 (1.248)       | [1.087] | 2.017 (0.064)   | [0.055] | 0.898           | 0.902           | 0.026           | 0.954 | 3.72 (1.46)   | 4.88 (2.60)   |  |  |
| 0     | 3     | 3.223 (2.986)       | [2.469] | 2.044 (0.036)   | [0.029] | 0.840           | 0.610           | 0.026           | 0.968 | 35.52 (5.56)  | 34.02 (7.52)  |  |  |
| 0.5   | 0.5   | 1.031 (4.390)       | [3.986] | 1.979 (1.377)   | [1.252] | 0.912           | 0.918           | 0.006           | 0.952 | 1.3 (0.79)    | 1.72 (1.09)   |  |  |
| 0.5   | 1     | 1.025 (2.603)       | [2.557] | 1.996 (0.716)   | [0.705] | 0.938           | 0.940           | 0.010           | 0.954 | 1.27 (0.74)   | 1.76 (1.11)   |  |  |
| 0.5   | 2     | 1.477 (1.784)       | [1.633] | 2.011 (0.079)   | [0.072] | 0.936           | 0.934           | 0.024           | 0.970 | 3.64 (1.53)   | 4.9 (2.66)    |  |  |
| 0.5   | 3     | 3.956 (3.832)       | [3.399] | 2.040 (0.039)   | [0.034] | 0.864           | 0.774           | 0.016           | 0.964 | 34.85 (5.68)  | 34.91 (7.20)  |  |  |
| 1     | 1     | 1.071 (0.990)       | [0.959] | 1.979 (0.452)   | [0.438] | 0.942           | 0.936           | 0.086           | 0.966 | 1.47 (0.83)   | 2.14 (1.33)   |  |  |
| 1     | 2     | 1.231 (0.776)       | [0.703] | 1.995 (0.121)   | [0.110] | 0.912           | 0.908           | 0.030           | 0.960 | 3.64 (1.42)   | 4.88 (2.58)   |  |  |
| 1     | 3     | 2.180 (1.425)       | [1.224] | 2.028 (0.051)   | [0.042] | 0.826           | 0.846           | 0.038           | 0.968 | 34.2 (5.94)   | 34.48 (7.81)  |  |  |
| 2     | 2     | 1.233 (0.362)       | [0.306] | 1.920 (0.219)   | [0.184] | 0.858           | 0.900           | 0.246           | 0.944 | 10.44 (2.47)  | 12.35 (6.31)  |  |  |
| 2     | 3     | 1.389 (0.504)       | [0.419] | 1.990 (0.108)   | [0.089] | 0.846           | 0.918           | 0.136           | 0.948 | 34.82 (7.11)  | 39.65 (11.21) |  |  |
| 3     | 3     | 1.377 (0.295)       | [0.233] | 1.864 (0.202)   | [0.157] | 0.660           | 0.842           | 0.704           | 0.966 | 84.13 (17.71) | 74.39 (18.89) |  |  |

$\beta_1$  and  $\beta_2$  are the effect parameters, and  $p_1$  and  $p_2$  are the powers. Coverage refers to the number of replications where the true  $\beta$  was contained within the corresponding 95%CI. The powers were correctly chosen (Correct) if the best-fitting fractional polynomial was also the correct fractional polynomial, whilst the correct model was within the set of powers that fit the data equally as well as the best-fitting fractional polynomial (Set) if the difference between twice the log-likelihood for the correct model and the best-fitting model was less than the 90th percentile of the relevant  $\chi^2$  distribution. The heuristic statistic (mean (SD) across simulations) is the sum of the absolute values of the predicted value of the outcome minus the correct value of the outcome at the mean value of the exposure in deciles of the IV-free distribution. The heuristic statistic is calculated both for the correct fractional polynomial (Correct FP), and for the best-fitted fractional polynomial (Best FP). SD, standard deviation; SE, standard error; FP, fractional polynomial; IV, instrumental variable; CI, confidence interval.

Table S3: Simulations to assess the impact of violations of the assumptions for the fractional polynomial method.

| Simulation            | Model       | $\beta$ | Fitting correct FP     |          |       | Power of test |       |  |
|-----------------------|-------------|---------|------------------------|----------|-------|---------------|-------|--|
|                       |             |         | Mean (SD) [Mean SE]    | Coverage | Quad  | Q             | FP    |  |
| IV–exposure           | Linear      | 0       | 0.003 (0.064) [0.064]  | 0.940    | 0.048 | 0.078         | 0.020 |  |
|                       | Linear      | 1       | 1.001 (0.063) [0.065]  | 0.952    | 0.036 | 0.046         | 0.022 |  |
|                       | Logarithm   | 2       | 1.967 (0.226) [0.211]  | 0.926    | 0.550 | 0.274         | 0.582 |  |
|                       | Square root | 2       | 1.974 (0.242) [0.235]  | 0.934    | 0.174 | 0.094         | 0.176 |  |
|                       | Quadratic   | 0.1     | 0.101 (0.009) [0.009]  | 0.954    | 0.612 | 0.318         | 0.586 |  |
| Exposure–outcome      | Linear      | 0       | -0.001 (0.079) [0.078] | 0.938    | 0.050 | 0.058         | 0.006 |  |
|                       | Linear      | 1       | 1.003 (0.080) [0.078]  | 0.944    | 0.044 | 0.068         | 0.030 |  |
|                       | Logarithm   | 2       | 1.977 (0.220) [0.216]  | 0.938    | 0.456 | 0.230         | 0.496 |  |
|                       | Square root | 2       | 1.980 (0.248) [0.250]  | 0.946    | 0.144 | 0.080         | 0.140 |  |
|                       | Quadratic   | 0.1     | 0.101 (0.026) [0.024]  | 0.940    | 0.114 | 0.098         | 0.092 |  |
| Both                  | Linear      | 0       | 0.009 (0.081) [0.077]  | 0.936    | 0.062 | 0.060         | 0.012 |  |
|                       | Linear      | 1       | 0.991 (0.080) [0.078]  | 0.930    | 0.056 | 0.070         | 0.042 |  |
|                       | Logarithm   | 2       | 1.972 (0.218) [0.216]  | 0.942    | 0.490 | 0.250         | 0.516 |  |
|                       | Square root | 2       | 2.005 (0.250) [0.250]  | 0.960    | 0.134 | 0.092         | 0.138 |  |
|                       | Quadratic   | 0.1     | 0.103 (0.024) [0.024]  | 0.956    | 0.128 | 0.100         | 0.116 |  |
| Both ( $\rho = 0.2$ ) | Linear      | 0       | 0.015 (0.082) [0.077]  | 0.938    | 0.114 | 0.086         | 0.022 |  |
|                       | Linear      | 1       | 1.004 (0.076) [0.078]  | 0.956    | 0.114 | 0.064         | 0.084 |  |
|                       | Logarithm   | 2       | 1.957 (0.208) [0.218]  | 0.950    | 0.352 | 0.162         | 0.382 |  |
|                       | Square root | 2       | 1.997 (0.258) [0.248]  | 0.938    | 0.078 | 0.064         | 0.088 |  |
|                       | Quadratic   | 0.1     | 0.100 (0.026) [0.024]  | 0.924    | 0.668 | 0.408         | 0.576 |  |

IV–exposure refers to the simulation setting where the IV–exposure association was allowed to vary across individuals. Exposure–outcome refers to the simulation setting where the exposure–outcome association was allowed to vary across individuals. Both refers to the simulation setting where both the IV–exposure and exposure–outcome associations were allowed to vary across individuals. Both ( $\rho = 0.2$ ) refers to the simulation setting where both the IV–exposure and exposure–outcome associations were allowed to vary across individuals with correlation of 0.2.  $\beta$  is the effect parameter. Coverage refers to the number of replications where the true  $\beta$  was contained within the corresponding 95%CI. SD, standard deviation; SE, standard error; Quad, quadratic test for assessing non-linearity; Q, Cochran-Q test; FP; fractional polynomial test; IV, instrumental variable; CI, confidence interval.

Table S4: Simulations to assess the impact of violations of the assumptions for the piecewise linear method assuming a threshold effect with  $\beta = 0.5$

(a) Overall results

| Varying               | Power of test |       |       |
|-----------------------|---------------|-------|-------|
|                       | Quad          | Q     | FP    |
| IV-exposure           | 0.848         | 0.706 | 0.772 |
| Exposure-outcome      | 0.826         | 0.638 | 0.716 |
| Both                  | 0.774         | 0.644 | 0.708 |
| Both ( $\rho = 0.2$ ) | 0.858         | 0.712 | 0.792 |

(b) Quantile results

| Simulation            | Parameter | Decile of the IV-free exposure distribution |       |       |       |       |       |       |       |       |       |
|-----------------------|-----------|---------------------------------------------|-------|-------|-------|-------|-------|-------|-------|-------|-------|
|                       |           | 1                                           | 2     | 3     | 4     | 5     | 6     | 7     | 8     | 9     | 10    |
| IV-exposure           | Correct   | 0.000                                       | 0.000 | 0.000 | 0.000 | 0.000 | 0.000 | 0.057 | 0.227 | 0.488 | 1.182 |
|                       | Mean      | 0.023                                       | 0.039 | 0.044 | 0.039 | 0.033 | 0.045 | 0.115 | 0.275 | 0.543 | 1.244 |
|                       | Coverage  | 0.934                                       | 0.928 | 0.934 | 0.938 | 0.934 | 0.918 | 0.908 | 0.932 | 0.934 | 0.926 |
| Exposure-outcome      | Correct   | 0.000                                       | 0.000 | 0.000 | 0.000 | 0.000 | 0.000 | 0.054 | 0.224 | 0.486 | 1.179 |
|                       | Mean      | 0.005                                       | 0.007 | 0.005 | 0.004 | 0.004 | 0.015 | 0.080 | 0.235 | 0.498 | 1.182 |
|                       | Coverage  | 0.936                                       | 0.924 | 0.924 | 0.932 | 0.930 | 0.926 | 0.932 | 0.948 | 0.952 | 0.950 |
| Both                  | Correct   | 0.000                                       | 0.000 | 0.000 | 0.000 | 0.000 | 0.000 | 0.057 | 0.227 | 0.488 | 1.182 |
|                       | Mean      | 0.025                                       | 0.041 | 0.045 | 0.042 | 0.038 | 0.048 | 0.116 | 0.270 | 0.530 | 1.222 |
|                       | Coverage  | 0.936                                       | 0.926 | 0.938 | 0.936 | 0.928 | 0.932 | 0.922 | 0.924 | 0.924 | 0.942 |
| Both ( $\rho = 0.2$ ) | Correct   | 0.000                                       | 0.000 | 0.000 | 0.000 | 0.000 | 0.000 | 0.057 | 0.227 | 0.488 | 1.182 |
|                       | Mean      | 0.028                                       | 0.045 | 0.049 | 0.043 | 0.036 | 0.046 | 0.115 | 0.275 | 0.542 | 1.286 |
|                       | Coverage  | 0.934                                       | 0.936 | 0.926 | 0.932 | 0.950 | 0.942 | 0.940 | 0.940 | 0.942 | 0.936 |

IV-exposure refers to the simulation setting where the IV-exposure association was allowed to vary across individuals. Exposure-outcome refers to the simulation setting where the exposure-outcome association was allowed to vary across individuals. Both refers to the simulation setting where both the IV-exposure and exposure-outcome associations were allowed to vary across individuals. Both ( $\rho = 0.2$ ) refers to the simulation setting where both the IV-exposure and exposure-outcome associations were allowed to vary across individuals with correlation of 0.2. Coverage refers to the number of replications where the true mean value of the outcome for that decile was contained within the corresponding 95% prediction interval. Quad, quadratic test for assessing non-linearity; Q, Cochran-Q test; FP; fractional polynomial test; IV, instrumental variable.

Table S5: Additional simulations to assess the impact of varying the effect of the IV on the exposure for the fractional polynomial method.

| Simulation     | Model       | $\beta$ | Fitting correct FP     |          |       | Power of test |       |  |
|----------------|-------------|---------|------------------------|----------|-------|---------------|-------|--|
|                |             |         | Mean (SD) [Mean SE]    | Coverage | Quad  | Q             | FP    |  |
| Low frequency  | Linear      | 0       | -0.001 (0.056) [0.057] | 0.958    | 0.014 | 0.046         | 0.042 |  |
|                | Linear      | 1       | 0.999 (0.059) [0.058]  | 0.940    | 0.036 | 0.054         | 0.054 |  |
|                | Logarithm   | 2       | 1.811 (0.197) [0.183]  | 0.800    | 0.524 | 0.504         | 0.266 |  |
|                | Square root | 2       | 1.894 (0.208) [0.207]  | 0.904    | 0.180 | 0.182         | 0.094 |  |
|                | Quadratic   | 0.1     | 0.110 (0.008) [0.008]  | 0.770    | 0.686 | 0.748         | 0.432 |  |
| Super-additive | Linear      | 0       | 0.011 (0.077) [0.072]  | 0.922    | 0.014 | 0.056         | 0.072 |  |
|                | Linear      | 1       | 1.000 (0.074) [0.075]  | 0.952    | 0.040 | 0.058         | 0.064 |  |
|                | Logarithm   | 2       | 1.994 (0.238) [0.242]  | 0.946    | 0.472 | 0.446         | 0.224 |  |
|                | Square root | 2       | 1.983 (0.279) [0.268]  | 0.950    | 0.144 | 0.144         | 0.076 |  |
|                | Quadratic   | 0.1     | 0.101 (0.010) [0.010]  | 0.938    | 0.524 | 0.532         | 0.270 |  |
| Sub-additive   | Linear      | 0       | 0.012 (0.095) [0.088]  | 0.924    | 0.014 | 0.052         | 0.062 |  |
|                | Linear      | 1       | 0.995 (0.089) [0.091]  | 0.958    | 0.044 | 0.056         | 0.068 |  |
|                | Logarithm   | 2       | 1.986 (0.279) [0.286]  | 0.952    | 0.360 | 0.318         | 0.170 |  |
|                | Square root | 2       | 1.972 (0.336) [0.322]  | 0.948    | 0.112 | 0.108         | 0.070 |  |
|                | Quadratic   | 0.1     | 0.100 (0.012) [0.013]  | 0.946    | 0.372 | 0.380         | 0.186 |  |

Low frequency refers to the simulation setting where the IV is a low frequency variant (minor allele frequency = 0.03) with a large effect on the exposure (0.75). Super-additive refers to the simulation setting where the first allele of the genetic variant increases the exposure by 0.1 units and the second allele by 0.3 units. Sub-additive refers to the simulation setting where the first allele of the genetic variant increases the exposure by 0.3 units and the second allele by 0.1 units.  $\beta$  is the effect parameter. Coverage refers to the number of replications where the true  $\beta$  was contained within the corresponding 95%CI. SD, standard deviation; SE, standard error; Quad, quadratic test for assessing non-linearity; Q, Cochran-Q test; FP; fractional polynomial test; IV, instrumental variable; CI, confidence interval.

Table S6: Additional simulations to assess the impact of varying the effect of the IV on the exposure for the piecewise linear method assuming a threshold effect with  $\beta = 0.5$ .

(a) Overall results

| Varying        | Power of test |       |       |
|----------------|---------------|-------|-------|
|                | Quad          | Q     | FP    |
| Low Frequency  | 0.844         | 0.892 | 0.754 |
| Super-additive | 0.636         | 0.698 | 0.552 |
| Sub-additive   | 0.406         | 0.536 | 0.372 |

(b) Quantile results

| Simulation     | Parameter | Decile of the IV-free exposure distribution |       |       |       |       |       |       |       |       |       |
|----------------|-----------|---------------------------------------------|-------|-------|-------|-------|-------|-------|-------|-------|-------|
|                |           | 1                                           | 2     | 3     | 4     | 5     | 6     | 7     | 8     | 9     | 10    |
| Low frequency  | Correct   | 0.000                                       | 0.000 | 0.000 | 0.000 | 0.000 | 0.000 | 0.005 | 0.174 | 0.436 | 1.130 |
|                | Mean      | 0.005                                       | 0.010 | 0.012 | 0.017 | 0.036 | 0.085 | 0.184 | 0.348 | 0.615 | 1.313 |
|                | Coverage  | 0.948                                       | 0.946 | 0.942 | 0.938 | 0.928 | 0.852 | 0.678 | 0.742 | 0.786 | 0.886 |
| Super-additive | Correct   | 0.000                                       | 0.000 | 0.000 | 0.000 | 0.000 | 0.000 | 0.028 | 0.198 | 0.459 | 1.153 |
|                | Mean      | 0.031                                       | 0.053 | 0.064 | 0.064 | 0.057 | 0.061 | 0.119 | 0.272 | 0.542 | 1.242 |
|                | Coverage  | 0.940                                       | 0.938 | 0.944 | 0.936 | 0.942 | 0.952 | 0.914 | 0.940 | 0.942 | 0.946 |
| Sub-additive   | Correct   | 0.000                                       | 0.000 | 0.000 | 0.000 | 0.000 | 0.000 | 0.049 | 0.219 | 0.480 | 1.174 |
|                | Mean      | 0.030                                       | 0.049 | 0.053 | 0.047 | 0.040 | 0.046 | 0.110 | 0.274 | 0.546 | 1.241 |
|                | Coverage  | 0.962                                       | 0.962 | 0.970 | 0.952 | 0.952 | 0.952 | 0.942 | 0.952 | 0.968 | 0.950 |

Low frequency refers to the simulation setting where the IV is a low frequency variant (minor allele frequency = 0.03) with a large effect on the exposure (0.75). Super-additive refers to the simulation setting where the first allele of the genetic variant increases the exposure by 0.1 units and the second allele by 0.3 units. Sub-additive refers to the simulation setting where where the first allele of the genetic variant increases the exposure by 0.3 units and the second allele by 0.1 units. Coverage refers to the number of replications where the true mean value of the outcome for that decile was contained within the corresponding 95% prediction interval. Quad, quadratic test for assessing non-linearity; Q, Cochran-Q test; FP; fractional polynomial test; IV, instrumental variable.
